# Supplementary material for: Trends in sexual activity and demand for and use of modern contraceptive methods in 74 countries: a retrospective analysis of nationally representative surveys
Source: PubMed Central journal article supplement — Lancet Glob Health. 2020 Mar 9;8(4):e567–79. doi: 10.1016/S2214-109X(20)30060-7 (PMC7083224; doi:10.1016/s2214-109x(20)30060-7), 2020-03-09
Supplement: mmc1.pdf [file mmc1.pdf]

# THE LANCET

## Global Health

### Supplementary appendix

This appendix formed part of the original submission and has been peer reviewed. We post it as supplied by the authors.

Supplement to: Slaymaker E, Scott RH, Palmer MJ, et al. Trends in sexual activity and demand for and use of modern contraceptive methods in 74 countries: a retrospective analysis of nationally representative surveys. *Lancet Glob Health* 2020; published online March 9. [http://dx.doi.org/10.1016/S2214-109X\(20\)30060-7](http://dx.doi.org/10.1016/S2214-109X(20)30060-7).

## Supplementary Material

|                                                                                                                                                                                                   |    |
|---------------------------------------------------------------------------------------------------------------------------------------------------------------------------------------------------|----|
| Flowchart to show exclusion of surveys .....                                                                                                                                                      | 1  |
| Summary of data available by country .....                                                                                                                                                        | 3  |
| Surveys excluded from analysis of sexual activity, demand for contraception and modern method use: .....                                                                                          | 5  |
| Samples with restricted eligibility for questions relevant to this paper: .....                                                                                                                   | 5  |
| Harmonisation of information on fertility intentions and contraceptive use .....                                                                                                                  | 6  |
| National estimates of odds ratios for trends over time in the proportions, of all women, who are sexually active, do not want to conceive and are not using a modern method of contraception..... | 12 |
| Surveys used in ecological analysis .....                                                                                                                                                         | 17 |
| Correlation between behavioural outcomes and national estimates of gender inequality and female education .....                                                                                   | 19 |
| Countries used in PCA and Figures 2-5.....                                                                                                                                                        | 20 |
| Results from the PCA .....                                                                                                                                                                        | 22 |

## Flowchart to show exclusion of surveys

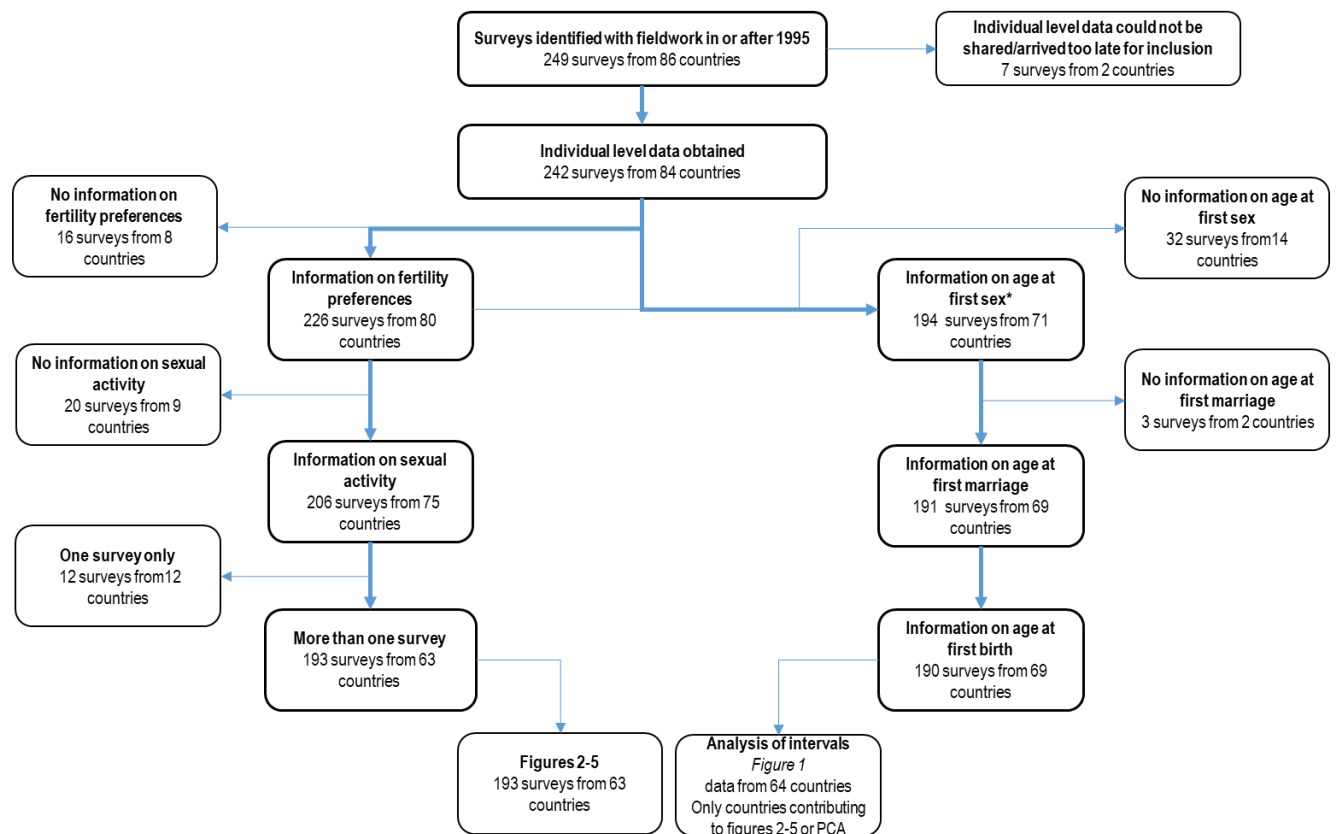

Note that Figure 2 does not show data from 4 surveys from 2 countries because Serbia and Montenegro only collected data on sexual behaviour for 18-24 year olds.

Figure S1: Flow chart to show exclusion of surveys from analysis

## Summary of data available by country

| Country                               | Surveys                                          | Number of surveys | N female respondents 15-49 | N male respondents 15-49 | Ever married samples | N female respondents aged 15-24 |
|---------------------------------------|--------------------------------------------------|-------------------|----------------------------|--------------------------|----------------------|---------------------------------|
| <b>C. &amp; S. Asia &amp; Oceania</b> |                                                  |                   |                            |                          |                      |                                 |
| Afghanistan                           | 2015 DHS                                         | 1                 | 29461                      | 10760                    | 1                    | 7912                            |
| Bangladesh                            | 2011 DHS, 2014 DHS                               | 2                 | 35612                      | 3382                     | 2                    | 10551                           |
| India                                 | 2006 DHS, 2015 DHS                               | 2                 | 246736                     | 173359                   | 0                    | 89674                           |
| Kazakhstan                            | 1995 DHS, 1999 DHS                               | 2                 | 8571                       | 1272                     | 0                    | 2686                            |
| Kyrgyzstan                            | 1997 DHS, 2012 DHS                               | 2                 | 12056                      | 2413                     | 0                    | 4484                            |
| Maldives                              | 2017 DHS                                         | 1                 | 7699                       | 4342                     | 0                    | 2133                            |
| Nepal                                 | 2001 DHS, 2006 DHS, 2011 DHS, 2016 DHS           | 4                 | 45055                      | 13899                    | 1                    | 17045                           |
| Pakistan                              | 2012 DHS, 2018 DHS                               | 2                 | 28626                      | 6825                     | 2                    | 5563                            |
| Tajikistan                            | 2012 DHS, 2017 DHS                               | 2                 | 20374                      | 0                        | 0                    | 7751                            |
| Uzbekistan                            | 1996 DHS, 2007 DHS                               | 2                 | 11256                      | 3178                     | 0                    | 3566                            |
| Vanuatu                               | 2008 DHS, 2014 MICS                              | 2                 | 5550                       | 4342                     | 0                    | 2137                            |
| <b>E. &amp; S.E. Asia</b>             |                                                  |                   |                            |                          |                      |                                 |
| Cambodia                              | 2000 DHS, 2005 DHS, 2010 DHS, 2014 DHS           | 4                 | 68506                      | 20160                    | 0                    | 25303                           |
| East Timor                            | 2009 DHS, 2016 DHS                               | 2                 | 25744                      | 8135                     | 0                    | 10739                           |
| Indonesia                             | 1997 DHS, 2002 DHS, 2007 DHS, 2012 DHS, 2017 DHS | 5                 | 186422                     | 31668                    | 3                    | 43592                           |
| Mongolia                              | 2010 MICS, 2013 MICS                             | 2                 | 21592                      | 9417                     | 0                    | 5657                            |
| Myanmar                               | 2016 DHS                                         | 1                 | 12885                      | 4737                     | 0                    | 3728                            |
| Philippines                           | 1998 DHS, 2003 DHS, 2008 DHS, 2013 DHS, 2017 DHS | 5                 | 82439                      | 4424                     | 0                    | 30063                           |
| <b>Latin America &amp; Caribbean</b>  |                                                  |                   |                            |                          |                      |                                 |
| Bolivia                               | 1998 DHS, 2003 DHS, 2008 DHS                     | 3                 | 45780                      | 13559                    | 0                    | 17719                           |
| Brazil                                | 1996 DHS                                         | 1                 | 12612                      | 2616                     | 0                    | 4528                            |
| Colombia                              | 1995 DHS, 2000 DHS, 2005 DHS, 2010 DHS, 2015 DHS | 5                 | 146409                     | 27480                    | 0                    | 51359                           |
| Cuba                                  | 2010 MICS, 2014 MICS                             | 2                 | 18068                      | 0                        | 0                    | 5082                            |
| Dominican Republic                    | 1996 DHS, 1999 DHS, 2002 DHS, 2007 DHS, 2013 DHS | 5                 | 44039                      | 15809                    | 0                    | 16914                           |
| Guatemala                             | 1995 DHS, 2015 DHS                               | 2                 | 38317                      | 9822                     | 0                    | 15818                           |
| Guyana                                | 2009 DHS                                         | 1                 | 4996                       | 3522                     | 0                    | 1791                            |
| Haiti                                 | 2000 DHS, 2006 DHS, 2012 DHS, 2017 DHS           | 4                 | 49574                      | 23656                    | 0                    | 21363                           |
| Honduras                              | 2006 DHS, 2012 DHS                               | 2                 | 42705                      | 6190                     | 0                    | 17699                           |
| Nicaragua                             | 1998 DHS, 2001 DHS                               | 2                 | 26694                      | 2652                     | 0                    | 11348                           |
| Peru                                  | 1996 DHS, 2000 DHS, 2009 DHS, 2012 DHS           | 4                 | 192006                     | 2242                     | 0                    | 67910                           |
| <b>N. America &amp; Europe</b>        |                                                  |                   |                            |                          |                      |                                 |
| Albania                               | 2009 DHS, 2017 DHS                               | 2                 | 18444                      | 7542                     | 0                    | 5629                            |
| Estonia                               | 2004 WHS, 2014 WHS                               | 2                 | 5085                       | 0                        | 0                    | 2727                            |
| France                                | 2010 Fecond                                      | 1                 | 5265                       | 3369                     | 0                    | 1298                            |
| Moldova                               | 2005 DHS                                         | 1                 | 7440                       | 1996                     | 0                    | 2548                            |
| Montenegro                            | 2005 MICS, 2013 MICS                             | 2                 | 5751                       | 0                        | 0                    | 1631                            |
| Netherlands                           | 2006 SHN, 2009 SHN, 2011 SHN                     | 3                 | 7179                       | 6626                     | 0                    | 2191                            |
| Republic of Serbia                    | 2005 MICS, 2010 MICS                             | 2                 | 12901                      | 0                        | 0                    | 3157                            |
| United Kingdom                        | 2011 natal                                       | 1                 | 6448                       | 4484                     | 0                    | 2140                            |
| United States of America              | 2002 NSFG, 2007 NSFG, 2013 NSFG                  | 3                 | 31222                      | 24652                    | 0                    | 10855                           |
| <b>Sub-Saharan Africa</b>             |                                                  |                   |                            |                          |                      |                                 |
| Angola                                | 2015 DHS                                         | 1                 | 14379                      | 5377                     | 0                    | 6423                            |
| Benin                                 | 1996 DHS, 2001 DHS, 2006 DHS, 2012 DHS, 2018 DHS | 5                 | 62031                      | 19474                    | 0                    | 22650                           |
| Burkina Faso                          | 1999 DHS, 2003 DHS, 2010 DHS                     | 3                 | 36009                      | 12055                    | 0                    | 14269                           |
| Burundi                               | 2010 DHS, 2016 DHS                               | 2                 | 26658                      | 10512                    | 0                    | 11449                           |

|                                  |                                                  |   |       |       |   |       |
|----------------------------------|--------------------------------------------------|---|-------|-------|---|-------|
| Cameroon                         | 1998 DHS, 2004 DHS, 2011 DHS                     | 3 | 31583 | 13630 | 0 | 14052 |
| Chad                             | 1997 DHS, 2004 DHS, 2015 DHS                     | 3 | 31258 | 8551  | 0 | 12522 |
| Comoros                          | 1996 DHS, 2012 DHS                               | 2 | 8379  | 2687  | 0 | 3702  |
| Democratic Republic of the Congo | 2007 DHS, 2013 DHS                               | 2 | 28822 | 12032 | 0 | 11973 |
| Ethiopia                         | 2000 DHS, 2005 DHS, 2011 DHS, 2016 DHS           | 4 | 61635 | 32254 | 0 | 25555 |
| Gabon                            | 2000 DHS, 2012 DHS                               | 2 | 14605 | 6803  | 0 | 6256  |
| Gambia                           | 2013 DHS                                         | 1 | 10233 | 3522  | 0 | 4564  |
| Ghana                            | 1998 DHS, 2003 DHS, 2008 DHS, 2014 DHS           | 4 | 24846 | 13797 | 0 | 9119  |
| Guinea                           | 1999 DHS, 2005 DHS, 2012 DHS, 2016 MICS          | 4 | 33512 | 7761  | 0 | 12357 |
| Ivory Coast                      | 1999 DHS, 2012 DHS, 2016 MICS                    | 3 | 24880 | 10837 | 0 | 9842  |
| Kenya                            | 1998 DHS, 2003 DHS, 2009 DHS, 2014 DHS           | 4 | 55599 | 21849 | 0 | 21918 |
| Lesotho                          | 2004 DHS, 2009 DHS, 2014 DHS                     | 3 | 21340 | 8110  | 0 | 9455  |
| Liberia                          | 2007 DHS, 2013 DHS                               | 2 | 16331 | 10127 | 0 | 6225  |
| Madagascar                       | 1997 DHS, 2004 DHS, 2009 DHS                     | 3 | 32384 | 9858  | 0 | 12780 |
| Malawi                           | 2000 DHS, 2004 DHS, 2010 DHS, 2015 DHS           | 4 | 72500 | 19947 | 0 | 30942 |
| Mali                             | 1996 DHS, 2001 DHS, 2006 DHS, 2012 DHS           | 4 | 47560 | 12663 | 0 | 18022 |
| Mozambique                       | 1997 DHS, 2003 DHS, 2011 DHS, 2015 DHS           | 4 | 41888 | 12771 | 0 | 17220 |
| Namibia                          | 2000 DHS, 2007 DHS, 2013 DHS                     | 3 | 25735 | 10593 | 0 | 10406 |
| Niger                            | 1998 DHS, 2006 DHS, 2012 DHS                     | 3 | 27960 | 9691  | 0 | 10534 |
| Nigeria                          | 2003 DHS, 2008 DHS, 2013 DHS                     | 3 | 79953 | 33283 | 0 | 30526 |
| Republic of Congo                | 2005 DHS, 2011 DHS                               | 2 | 17870 | 7587  | 0 | 6987  |
| Rwanda                           | 2000 DHS, 2005 DHS, 2010 DHS, 2015 DHS           | 4 | 48910 | 18226 | 0 | 20527 |
| Senegal                          | 1997 DHS, 2005 DHS, 2011 DHS, 2016 DHS           | 4 | 64872 | 16983 | 0 | 28102 |
| Sierra Leone                     | 2008 DHS, 2013 DHS                               | 2 | 24032 | 9538  | 0 | 9197  |
| South Africa                     | 1998 DHS, 2016 DHS                               | 2 | 20249 | 3179  | 0 | 7372  |
| Swaziland                        | 2006 DHS                                         | 1 | 4987  | 4156  | 0 | 2292  |
| Togo                             | 1998 DHS, 2014 DHS                               | 2 | 18049 | 7532  | 0 | 6558  |
| Uganda                           | 1995 DHS, 2001 DHS, 2006 DHS, 2011 DHS, 2016 DHS | 5 | 50027 | 11527 | 0 | 21780 |
| United Republic of Tanzania      | 1996 DHS, 1999 DHS, 2004 DHS, 2010 DHS, 2015 DHS | 5 | 45883 | 13913 | 0 | 18864 |
| Zambia                           | 1996 DHS, 2002 DHS, 2007 DHS, 2013 DHS           | 4 | 39236 | 23240 | 0 | 16988 |
| Zimbabwe                         | 1999 DHS, 2005 DHS, 2010 DHS, 2015 DHS           | 4 | 33940 | 24460 | 0 | 14508 |
| W. Asia & N. Africa              |                                                  |   |       |       |   |       |
| Armenia                          | 2000 DHS, 2005 DHS, 2010 DHS, 2016 DHS           | 4 | 25034 | 7385  | 0 | 7925  |
| Azerbaijan                       | 2006 DHS                                         | 1 | 8444  | 2253  | 0 | 2838  |
| Jordan                           | 2002 DHS, 2007 DHS, 2012 DHS, 2017 DHS           | 4 | 42923 | 5684  | 4 | 5898  |

*Table S1: Summary of data available for men and women aged 15-49 by SDG region and country*

**Surveys excluded from analysis of sexual activity, demand for contraception and modern method use:**

Surveys from Australia, Botswana, Britain (2000) , Finland, France (2016) and South Africa (2002, 2005, 2008, 2012) had no information on fertility intentions and DHS from Bangladesh (1997-2007), Cote d'Ivoire (2005), Egypt, India (1999), Jordan (1997), Maldives (2009), Morocco (2003), Pakistan (2006), Turkey, Vietnam and Yemen (2013) had no information on timing of last sex. All surveys contained information on the use of modern methods of contraception.

**Samples with restricted eligibility for questions relevant to this paper:**

Four countries only surveyed ever-married women (Afghanistan, Bangladesh, Jordan, Pakistan) and four changed from ever-married samples to samples of all women (India, Indonesia, Maldives and Nepal) and the early ever-married samples were not used for this analysis. In two countries, Serbia and Montenegro, in the earliest survey the relevant questions were addressed only to women aged 15-24.

In addition, in surveys in Bangladesh, India 1998, Indonesia, and Jordan 2002-2017, formerly married women were not asked about their fertility intentions and in Senegal 1997 never married women were not asked; in these surveys we assumed no unmarried women were trying to conceive.

## Harmonisation of information on fertility intentions and contraceptive use

### Fertility intentions

#### DHS

Q803/4, var 604: To all women NOT STERILISED OR PARTNER STERILISED: After the child you are expecting now, would you like to have another child, or would you prefer not to have any more children?  
OR Would you like to have (a/another) child, or would you prefer not to have any (more) children?

- Responses: Yes, no, says can't get pregnant (if not currently pregnant), undecided/don't know

Q805, var 605: If Yes, followed by: How long would you like to wait from now before the birth of (a/another) child? OR After the birth of the child you are expecting now, how long would you like to wait before the birth of another child?

- Responses coded into categories <12m, 1year, 2years, 3 years, 4 years, 5 years, 6+ years, non-numeric, don't know

#### MICS

To women who are not currently pregnant and not sterilised: UN6 Would you like to have (a/another) child, or would you prefer not to have any (more) children?

- Responses: Yes, have a/nother child, no more/none, says cannot get pregnant, undecided/don't know

If yes to UN6, asked: UN7: How long would you like to wait before the birth of a/nother child?

Responses: Coded in months and years, or soon/now, says cannot get pregnant, after marriage, other, don't know

To women who are not currently pregnant and not sterilised: UN6 Would you like to have (a/another) child, or would you prefer not to have any (more) children?

- Responses: Yes, have a/nother child, no more/none, says cannot get pregnant, undecided/don't know

If yes to UN6, asked: UN7: How long would you like to wait before the birth of a/nother child?

Responses: Coded in months and years, or soon/now, says cannot get pregnant, after marriage, other, don't know

#### National surveys USA 2002, 2007, 2013 NSFG

EH-1: Is the reason you are not using a method of birth control now because you, yourself, want to become pregnant as soon as possible?

#### Estonia 2014 WHS

Q79. If you did not use contraception during your last sexual intercourse, what was the reason? *Please choose one main reason. If you did use contraception during your last sexual intercourse, then please proceed to question 80.*

I wanted to get pregnant  
 I am/was pregnant  
 I was breast feeding a less than 6-month-old baby  
 I was not aware of available contraceptive methods  
 I was afraid of the side effects of contraceptive methods  
 My partner didn't want/didn't allow me to use contraception  
 For religious reasons  
 I am/my partner is infertile  
 Other reason (*please specify*) \_\_\_\_\_

**Estonia 2004  
WHS**

Q72. If you did not use a contraceptive method during your last sexual intercourse, what was the reason? (*choose a maximum of three answers*)  
 I was not aware of available contraceptive methods  
 I didn't want to use contraception  
 My partner didn't want/didn't allow me to use contraception  
 We do not need contraception as we are planning a pregnancy  
 We do not use contraception for religious reasons 141  
 We do not need contraception as i am pregnant at the moment  
 We do not need contraception as i / my partner is infertile  
 Other reason,  
*what?* \_\_\_\_\_

**Netherlands  
2006 SHN**

V410 Are you currently trying to conceive?  
 Responses: Yes/No

**Netherlands  
2009 SHN**

Q125 Are you trying to get pregnant now?  
 Responses: Yes/No

**Netherlands  
2011 SHN**

F02. [A2 = 2] Are you trying to conceive now? / [A2 = 1] Are you trying to get pregnant now?  
 Responses: Yes/No

**France 2010  
FECOND**

C11: Asked to all women NOT STERILE AND PARTNER NOT STERILE, but different wording depending on whether has children, has no children or is pregnant: Do you want [more] children [after this one], whether that is now or at a later date?  
 Responses: yes, no, don't know, not answered  
 If answer yes and NOT PREGNANT OR TRYING, then asked C15: when would you like a/your next child?  
 Responses: Now, in the next two years, between two and give years, later, not answered, don't know



## Contraceptive use

DHS Q303: Are you or your partner currently doing something or using any method to delay or avoid getting pregnant?  
Which method are you using? RECORD ALL MENTIONED.  
Example list of responses (varies by country):  
Female sterilization  
Male sterilization  
Iud  
Injectables  
Implants  
Pill  
Condom  
Female condom  
Emergency contraception .  
Standard days method  
Lactational amenorrhea method  
Rhythm method  
Withdrawal  
Other modern method  
Other traditional method

MICS CP2: To all women who are not currently pregnant: Couples use various ways or methods to delay or avoid a pregnancy. Are you currently doing something or using any method to delay or avoid getting pregnant?  
CP3: What are you doing to delay or avoid a pregnancy? RECORD ALL MENTIONED  
Example list (varies by country):  
  
Female sterilisation  
Male sterilisation  
IUD  
Injectables  
Implants  
Pill  
Male condom  
Female condom  
Diaphragm  
Foam / Jelly  
Lactational amenorrhoea method (LAM)  
Periodic abstinence / Rhythm  
Withdrawal  
Other (specify)

National  
surveys

**USA 2002,  
2007, 2013  
NSFG**

Applicable if R had at least 1 sexual partner in the past 12 months and last partner in past 12 months was not the first partner or was the first partner but R had sex with him more than once  
 EF-1 : Looking at Card 33, the [time / last time] you had intercourse with [LAST PARTNER], in [DATE OF LAST SEX WITH LAST PARTNER], did you or he use any method?  
 EF-2 : Which method or methods on Card 33 did you or he use?  
 Birth control pills  
 Condom  
 Partner's vasectomy  
 Female sterilizing operation, such as tubal sterilization and hysterectomy  
 Withdrawal, pulling out  
 Depo-Provera, injectables  
 Hormonal implant (Norplant, Implanon, or Nexplanon)  
 Calendar rhythm, Standard Days, or Cycle Beads method  
 Safe period by temperature or cervical mucus test (Two Day, Billings Ovulation, or Sympto-thermal Method)  
 Jelly or cream  
 Suppository, insert  
 IUD, coil, or loop  
 Emergency contraception  
 Other method -- specify  
 Respondent was sterile  
 Respondent's partner was sterile  
 Contraceptive patch  
 Vaginal contraceptive ring  
 Don't know

**Netherlands  
2006 SHN**

V441 How have you mainly protected yourself against pregnancy lately?

Response list (multiple responses possible):

The pill or the mini pill  
 The puncture pill  
 The plaster pill (Evra)  
 Nuvaring (contraceptive ring)  
 Implanon (contraceptive staff)  
 Mirena (hormonal coil)  
 Spiral (copper IUD)  
 Sterilization partner  
 Sterilization itself  
 Condom  
 Pessary (rubber dome)  
 Periodic abstinence or other 'rhythm' methods (no sex during fertile period)  
 Coitus interruptus (man pulls the penis out of the vagina before cumming)  
 I have not protected myself  
 I don't have to protect myself

Otherwise, namely

**Netherlands  
2009 SHN**

Q129. Are you currently using a method of not getting pregnant? If so, what have you been using (especially) lately? Note: sterilization is also included.

Response list (single response possible):

I do not use a contraceptive method  
 The pill or the mini pill  
 Condom  
 The pill and condom at the same time  
 The puncture pill  
 The plaster pill (Evra)  
 Birth control (Nuvaring)  
 Implant (Implanon)  
 Hormone IUD (Mirena)  
 Spiral (copper IUD)  
 My partner has been sterilized  
 I have been sterilized  
 Pessary (rubber dome)  
 Periodic abstinence or other rhythm methods (not making love during a fertile period)  
 Retreat (man pulls the cum before penis back from the vagina)

**Netherlands  
2011 SHN**

F08. Are you currently using a method of not getting pregnant? If so, what have you been using (especially) lately? Note: sterilization is also included.

Response list:

the pill or the mini pill  
 the condom  
 the pill and the condom at the same time  
 pessary ( rubber shield in the vagina)  
 the puncture  
 the plaster pill (Evra)  
 the contraceptive ring (Nuvaring)  
 the implant (Implanon)  
 the hormone IUD (Mirena)  
 the IUD (copper IUD)  
 my partner is sterilized  
 I am sterilized  
 periodic abstinence or other rhythm methods (no sex during the fertile period)  
 withdrawal (the man withdraws the penis from the vagina before cumming)  
 I do not use a contraceptive method

**Estonia 2004  
WHS**

70. Which contraceptive method did you use during **your last sexual intercourse?** (*you can choose several alternatives*)
- 1a we did not use any contraceptive method as we are trying to conceive  
1b we don't need/use any contraceptive method as we are not able to conceive
- 2 contraceptive pills  
2a contraceptive patch  
3 intrauterine device (“spiral”)  
4 condom  
5 spermicide (vaginal ovules, creams)  
6 diaphragm  
7 contraceptive implants  
8 sterilisation: own, partner (*please underline*)  
9 rhythm method (calculating “risky” days)  
10 withdrawal (a man does not let the sperm into the vagina)  
11 vaginal douche (*with what agent?*) .....  
12 emergency contraception (SOS-pills, Postinor)  
13 some other method, *what?* .....

**Estonia 2014  
WHS**

78. Which contraceptive method did you use during your last sexual intercourse? (*you can choose several answers*)
- 1 I did not use a contraceptive  
2 Hormonal contraceptive method (pills, patch, vaginal ring)  
3 Progesterone-only injectable (Depo-Provera)  
4 Hormonal intrauterine system (hormonal IUD Mirena)  
5 Intrauterine device (copper coil)  
6 Condom  
7 Spermicides (vaginal ovules, creams)  
8 Implants  
9 Sterilisation  
10 Rhythm method (calculating “risky” days)  
11 Withdrawal (the man does not let the sperm into the vagina)  
12 Vaginal douching after intercourse  
13 Emergency contraceptive pills (SOS-pills)  
14 Some other method (please specify) \_\_\_\_\_  
15 I don't remember

*Table S2: Questions used to ascertain fertility intentions and contraceptive use.*

**National estimates of odds ratios for trends over time in the proportions, of all women, who are sexually active, do not want to conceive and are not using a modern method of contraception.**

Figure S2 shows the crude odds ratios, for all women in each country, comparing between surveys the odds of being sexually active, not wanting to conceive and not using contraception. It is shown in three groups: those countries that have shown a decrease over time, the countries with an increase and countries where there has been no overall change. We grouped the countries based on the OR for all women; we then looked for an interaction between age (15-24 and 25-49) and change over time and, in the 39 countries where that was important, we present the age stratified ORs. Divergent trends in the two age groups were seen in Bolivia, Colombia, Peru, Haiti, Philippines, Jordan, Cameroon and perhaps also India, Comoros, D.R. Congo and Mozambique. In India, Cameroon, Haiti, DR Congo, Comoros and Bolivia these divergent trends produced not change in the overall proportion of women sexually active, not wanting to conceive and not using a modern method. In Jordan the overall increase was despite a decrease in this proportion among young women.

### Decrease

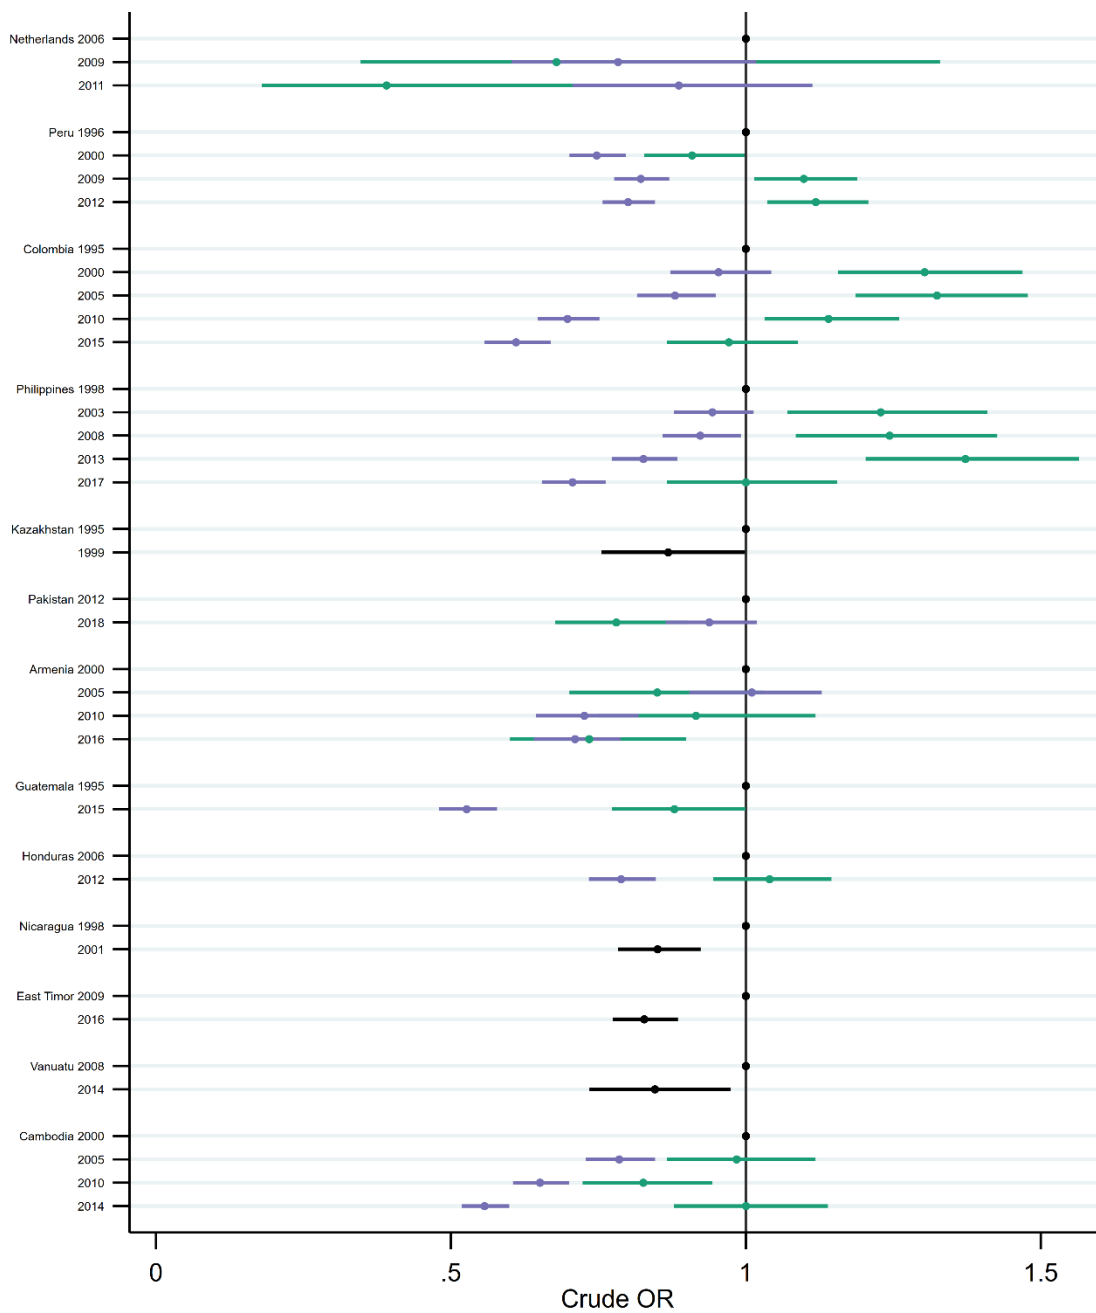

—●— Women 15-49     —●— Women 15-24  
—●— Women 25-49

### Decrease- sub-Saharan Africa

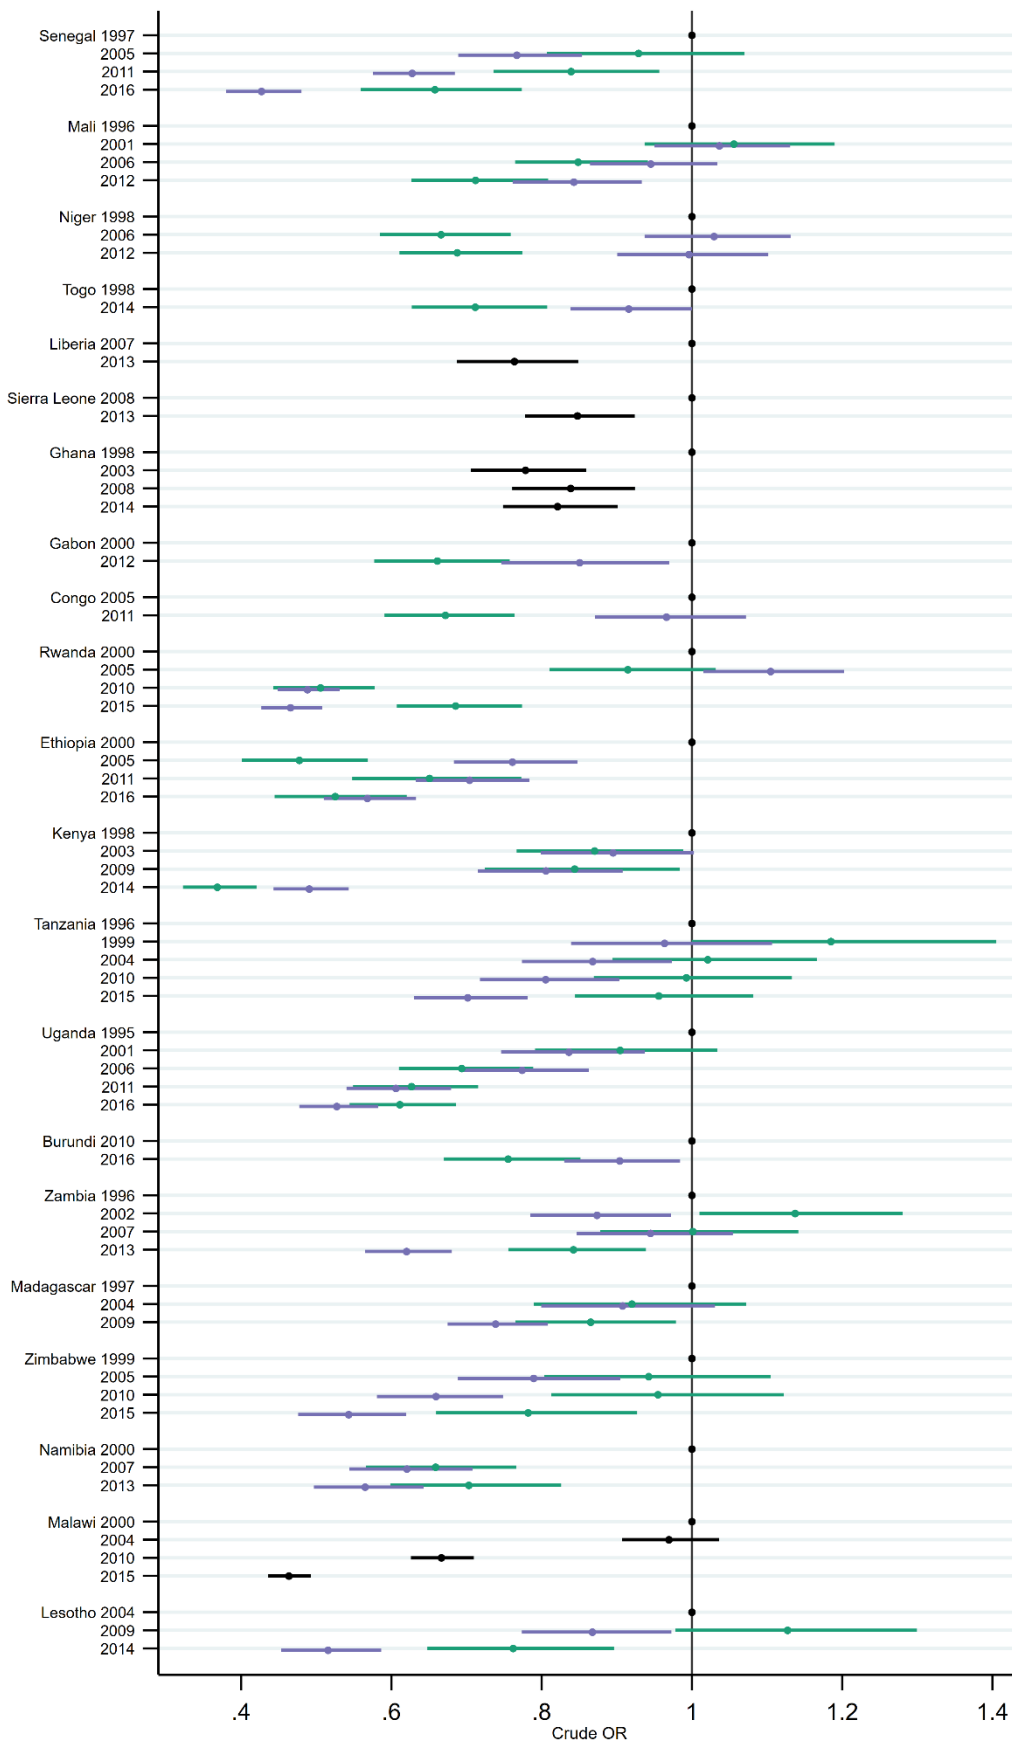

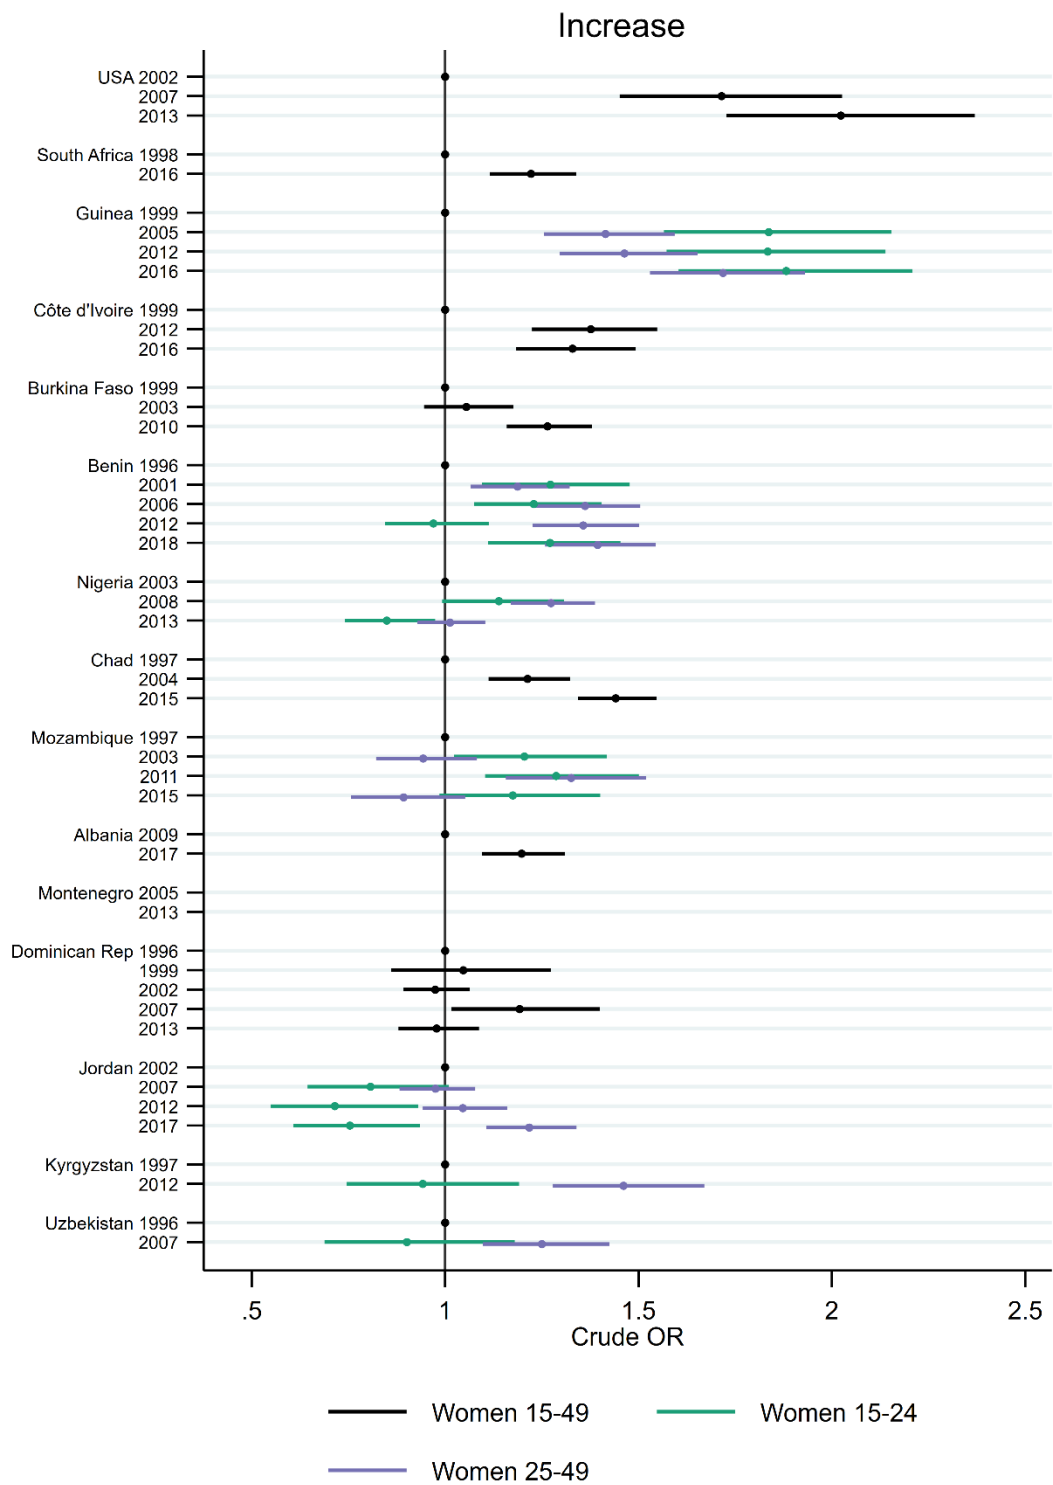



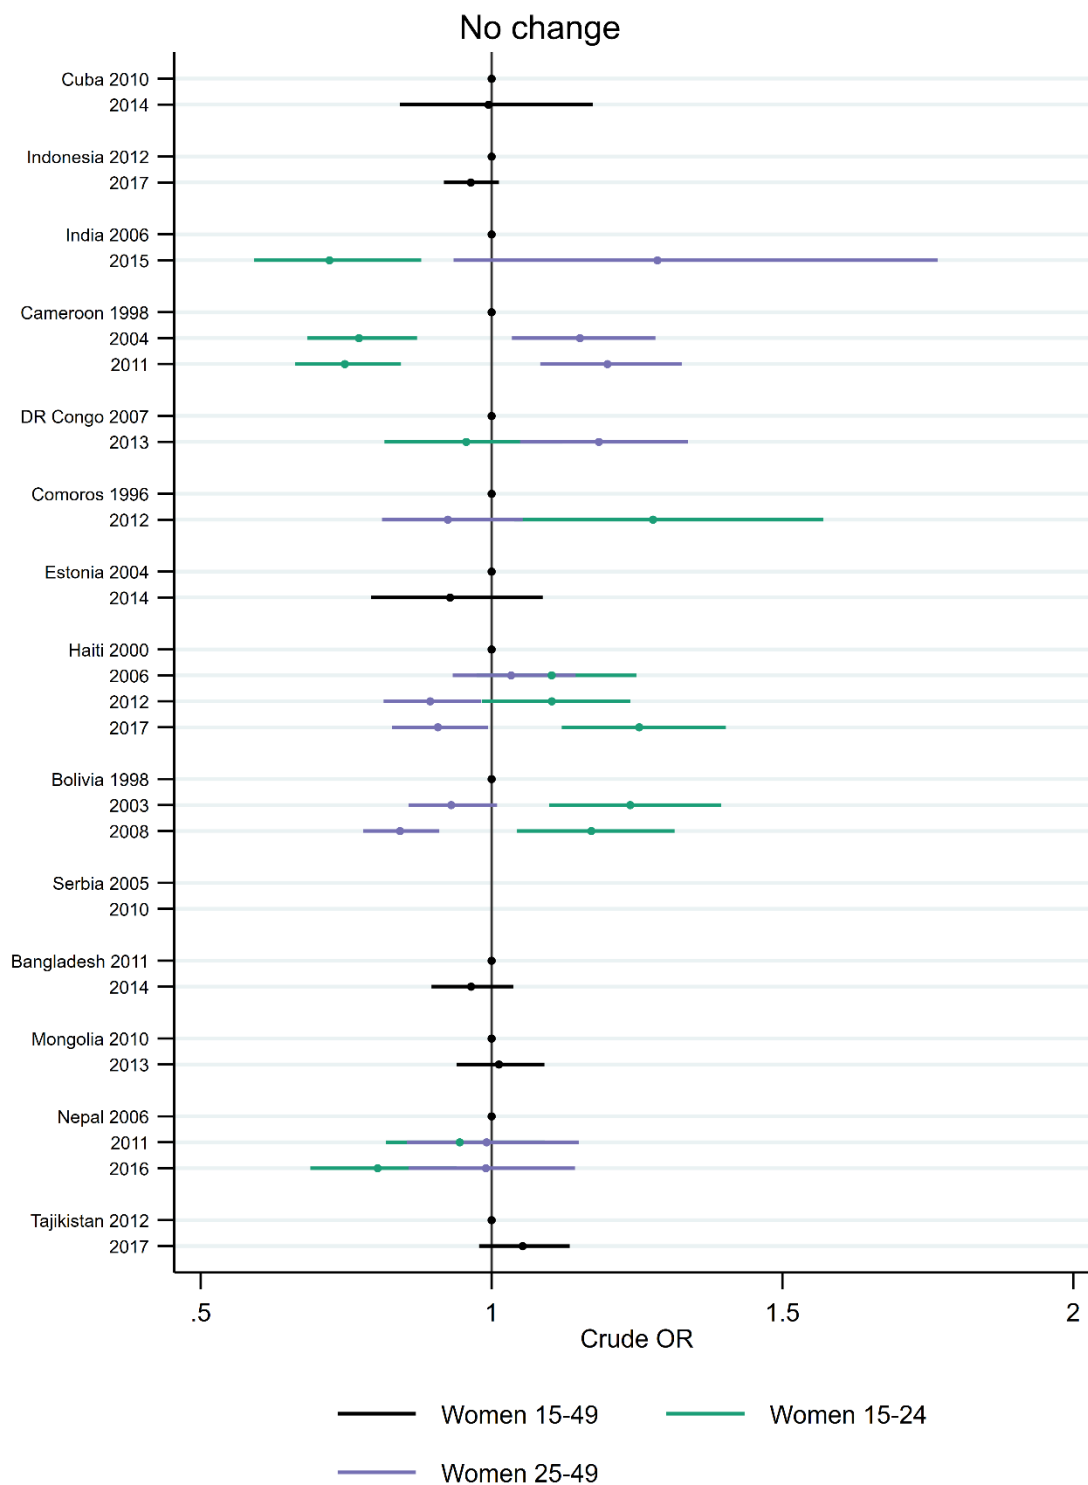

*Figure S2:* Crude odds ratios, for each country, for changes over time in the proportion of all women who are sexually active, not wanting to conceive and not using a modern method of contraception.

## Surveys used in ecological analysis

### Gender Development Index

A

Afghanistan, Albania, Armenia, Australia, Azerbaijan, Bangladesh, Benin, Bolivia, Britain, Burkina Faso, Burundi, Cambodia, Cameroon, Chad, Colombia, Comoros, Congo, Côte d'Ivoire, Cuba, Dominican Rep, DR Congo, East Timor, Estonia, Ethiopia, Finland, France, Gabon, Gambia, Ghana, Guatemala, Guinea, Guyana, Haiti, Honduras, India, Indonesia, Jordan, Kazakhstan, Kenya, Kyrgyzstan, Lesotho, Liberia, Malawi, Maldives, Mali, Moldova, Mongolia, Mozambique, Myanmar, Namibia, Nepal, Netherlands, Nicaragua, Niger, Nigeria, Pakistan, Peru, Philippines, Rwanda, Senegal, Sierra Leone, South Africa, Tajikistan, Tanzania, Togo, Uganda, USA, Vietnam, Zambia, Zimbabwe

B Afghanistan, Albania, Armenia, Azerbaijan, Bangladesh, Benin, Bolivia, Britain, Burkina Faso, Burundi, Cambodia, Cameroon, Chad, Colombia, Comoros, Congo, Côte d'Ivoire, Cuba, Dominican Rep, DR Congo, East Timor, Estonia, Ethiopia, France, Gabon, Gambia, Ghana, Guatemala, Guinea, Guyana, Haiti, Honduras, India, Indonesia, Jordan, Kazakhstan, Kenya, Kyrgyzstan, Lesotho, Liberia, Malawi, Maldives, Mali, Moldova, Mongolia, Mozambique, Myanmar, Namibia, Nepal, Netherlands, Nicaragua, Niger, Nigeria, Pakistan, Peru, Philippines, Rwanda, Senegal, Sierra Leone, South Africa, Tajikistan, Tanzania, Togo, Uganda, USA, Zambia, Zimbabwe

C Afghanistan, Albania, Armenia, Azerbaijan, Bangladesh, Benin, Bolivia, Britain, Burkina Faso, Burundi, Cambodia, Cameroon, Chad, Colombia, Comoros, Congo, Côte d'Ivoire, Cuba, Dominican Rep, DR Congo, East Timor, Estonia, Ethiopia, France, Gabon, Gambia, Ghana, Guatemala, Guinea, Guyana, Haiti,

### Female expected years of education

Afghanistan, Albania, Angola, Armenia, Australia, Azerbaijan, Bangladesh, Benin, Bolivia, Britain, Burkina Faso, Burundi, Cambodia, Cameroon, Chad, Colombia, Comoros, Congo, Côte d'Ivoire, Cuba, Dominican Rep, DR Congo, East Timor, Estonia, Ethiopia, Finland, France, Gabon, Gambia, Ghana, Guatemala, Guinea, Guyana, Haiti, Honduras, India, Indonesia, Jordan, Kazakhstan, Kenya, Kyrgyzstan, Lesotho, Liberia, Madagascar, Malawi, Maldives, Mali, Moldova, Mongolia, Mozambique, Myanmar, Namibia, Nepal, Netherlands, Nicaragua, Niger, Nigeria, Pakistan, Peru, Philippines, Rwanda, Senegal, Sierra Leone, South Africa, Tajikistan, Tanzania, Togo, Uganda, USA, Uzbekistan, Vanuatu, Vietnam, Zambia, Zimbabwe

Afghanistan, Albania, Angola, Armenia, Azerbaijan, Bangladesh, Benin, Bolivia, Britain, Burkina Faso, Burundi, Cambodia, Cameroon, Chad, Colombia, Comoros, Congo, Côte d'Ivoire, Cuba, Dominican Rep, DR Congo, East Timor, Estonia, Ethiopia, France, Gabon, Gambia, Ghana, Guatemala, Guinea, Guyana, Haiti, Honduras, India, Indonesia, Jordan, Kazakhstan, Kenya, Kyrgyzstan, Lesotho, Liberia, Madagascar, Malawi, Maldives, Mali, Moldova, Mongolia, Mozambique, Myanmar, Namibia, Nepal, Netherlands, Nicaragua, Niger, Nigeria, Pakistan, Peru, Philippines, Rwanda, Senegal, Sierra Leone, South Africa, Tajikistan, Tanzania, Togo, Uganda, USA, Uzbekistan, Vanuatu, Zambia, Zimbabwe

Afghanistan, Albania, Angola, Armenia, Azerbaijan, Bangladesh, Benin, Bolivia, Britain, Burkina Faso, Burundi, Cambodia, Cameroon, Chad, Colombia, Comoros, Congo, Côte d'Ivoire, Cuba, Dominican Rep, DR Congo, East Timor, Estonia, Ethiopia, France, Gabon, Gambia, Ghana, Guatemala, Guinea, Guyana, Haiti,

Honduras, India, Indonesia, Jordan,  
Kazakhstan, Kenya, Kyrgyzstan, Lesotho,  
Liberia, Malawi, Maldives, Mali, Moldova,  
Mongolia, Mozambique, Myanmar,  
Namibia, Nepal, Netherlands, Nicaragua,  
Niger, Nigeria, Pakistan, Peru, Philippines,  
Rwanda, Senegal, Sierra Leone, South  
Africa, Tajikistan, Tanzania, Togo, Uganda,  
USA, Zambia, Zimbabwe

Honduras, India, Indonesia, Jordan,  
Kazakhstan, Kenya, Kyrgyzstan, Lesotho,  
Liberia, Madagascar, Malawi, Maldives,  
Mali, Moldova, Mongolia, Mozambique,  
Myanmar, Namibia, Nepal, Netherlands,  
Nicaragua, Niger, Nigeria, Pakistan, Peru,  
Philippines, Rwanda, Senegal, Sierra Leone,  
South Africa, Tajikistan, Tanzania, Togo,  
Uganda, USA, Uzbekistan, Vanuatu,  
Zambia, Zimbabwe

## Correlation between behavioural outcomes and national estimates of gender inequality and female education

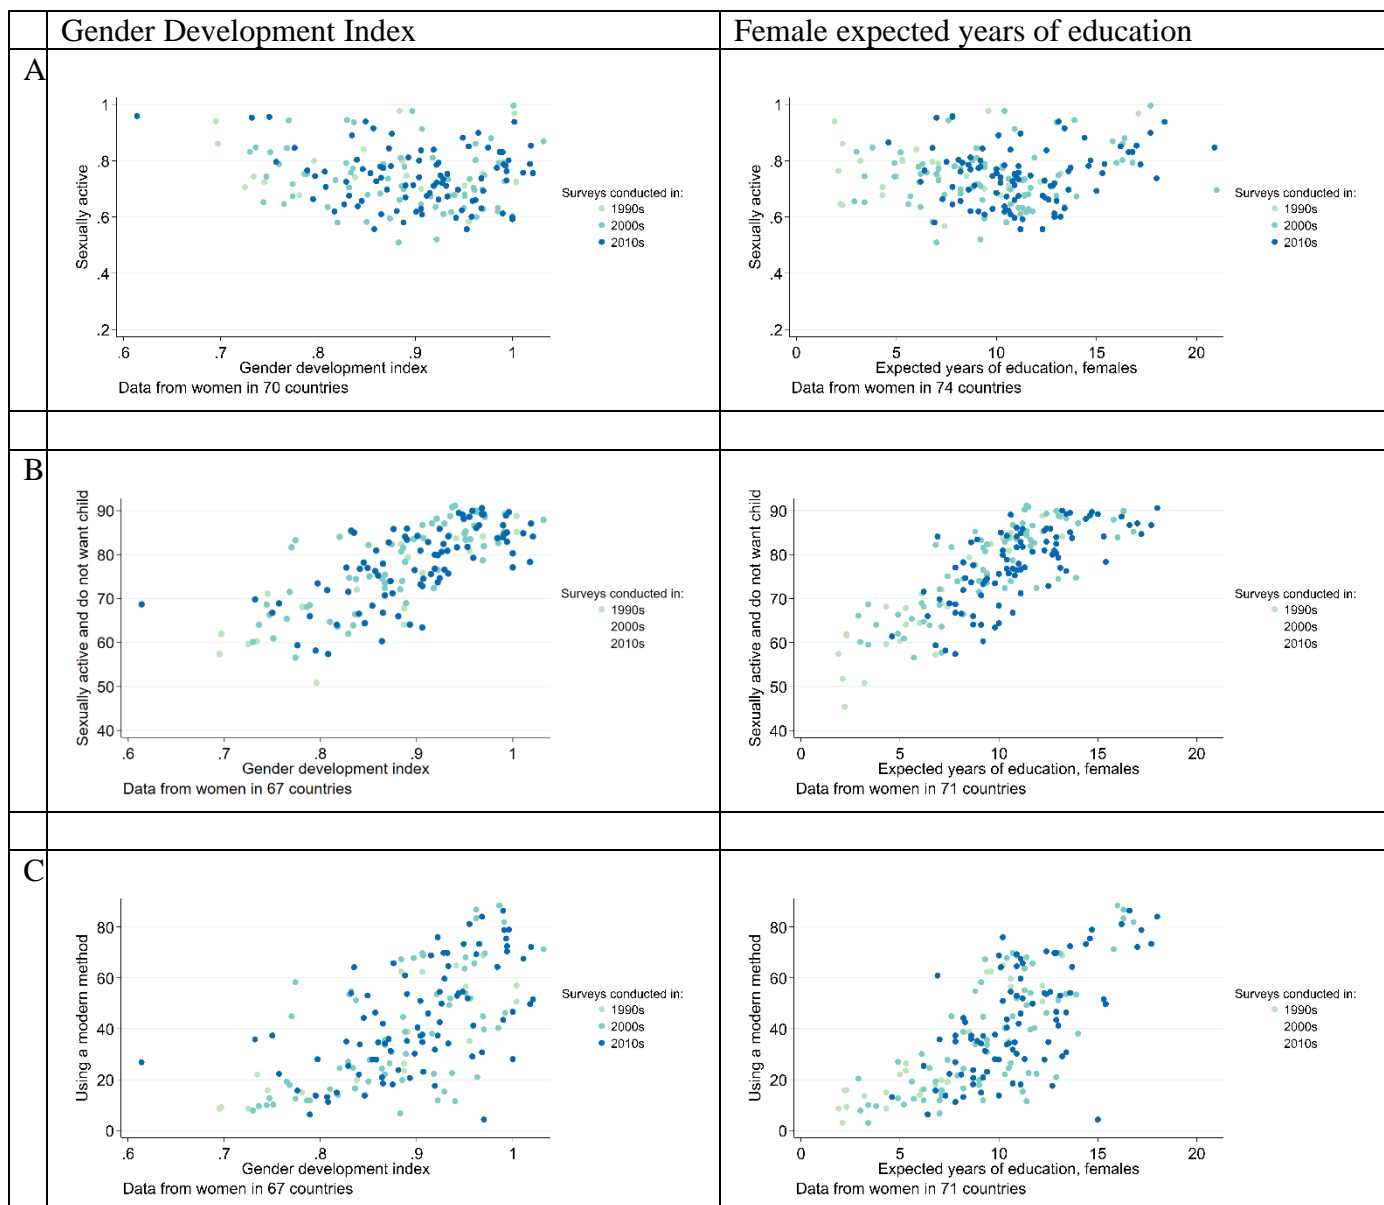

*Figure S3:* Scatter plots showing the correlation, for survey level estimates of A) proportion sexually active B) the proportion of sexually active women who do not want to conceive and C) the proportion of women who are sexually active, not wanting to conceive and using a modern method of contraception with both GDI and expected years of female education.

## Countries used in PCA and Figures 2-5

| Country       | Life events (Fig 1) | Contraceptive demand and use (Figs 2-5) | PCA |
|---------------|---------------------|-----------------------------------------|-----|
| Albania       | •                   | •                                       | •   |
| Angola        | •                   |                                         |     |
| Armenia       | •                   | •                                       | •   |
| Azerbaijan    | •                   |                                         |     |
| Bangladesh    | •                   | •                                       |     |
| Benin         | •                   | •                                       | •   |
| Bolivia       | •                   | •                                       |     |
| Britain       | •                   |                                         | •   |
| Burkina Faso  | •                   | •                                       | •   |
| Burundi       | •                   | •                                       | •   |
| Cambodia      | •                   | •                                       | •   |
| Cameroon      | •                   | •                                       | •   |
| Chad          | •                   | •                                       | •   |
| Colombia      | •                   | •                                       | •   |
| Comoros       | •                   | •                                       | •   |
| Congo         | •                   | •                                       | •   |
| Côte d'Ivoire | •                   | •                                       | •   |
| Cuba          | •                   | •                                       |     |
| Dominican Rep | •                   | •                                       | •   |
| DR Congo      | •                   | •                                       | •   |
| East Timor    | •                   | •                                       | •   |
| Egypt         |                     |                                         |     |
| Estonia       |                     | •                                       |     |
| Ethiopia      |                     | •                                       | •   |
| Gabon         | •                   | •                                       | •   |
| Gambia        | •                   |                                         | •   |
| Ghana         | •                   | •                                       | •   |
| Guatemala     | •                   | •                                       | •   |
| Guinea        | •                   | •                                       | •   |
| Guyana        | •                   |                                         | •   |
| Haiti         | •                   | •                                       | •   |
| Honduras      | •                   | •                                       | •   |
| India         | •                   | •                                       | •   |
| Indonesia     | •                   | •                                       |     |
| Jordan        |                     | •                                       |     |
| Kazakhstan    |                     | •                                       |     |
| Kenya         | •                   | •                                       | •   |
| Kyrgyzstan    | •                   | •                                       | •   |
| Lesotho       | •                   | •                                       | •   |
| Liberia       | •                   | •                                       | •   |
| Madagascar    | •                   | •                                       |     |
| Malawi        | •                   | •                                       | •   |
| Maldives      | •                   |                                         |     |
| Mali          | •                   | •                                       | •   |
| Moldova       | •                   |                                         |     |

|              |   |   |   |
|--------------|---|---|---|
| Mongolia     | • | • | • |
| Montenegro   | • | • |   |
| Mozambique   | • | • | • |
| Myanmar      | • |   |   |
| Namibia      | • | • | • |
| Nepal        |   | • |   |
| Netherlands  |   | • |   |
| Nicaragua    | • | • |   |
| Niger        | • | • | • |
| Nigeria      | • | • | • |
| Pakistan     | • | • |   |
| Peru         | • | • |   |
| Philippines  | • | • |   |
| Rwanda       | • | • | • |
| Senegal      | • | • | • |
| Serbia       |   | • |   |
| Sierra Leone | • | • | • |
| South Africa | • | • | • |
| Swaziland    | • |   |   |
| Tajikistan   | • | • |   |
| Tanzania     | • | • |   |
| Togo         | • | • | • |
| Tuvalu       | • |   |   |
| Uganda       | • | • | • |
| USA          | • | • | • |
| Uzbekistan   | • | • |   |
| Vanuatu      | • | • |   |
| Zambia       | • | • | • |
| Zimbabwe     | • | • | • |

*Table S3:* Countries used in PCA and analyses underlying Figures 2-5.

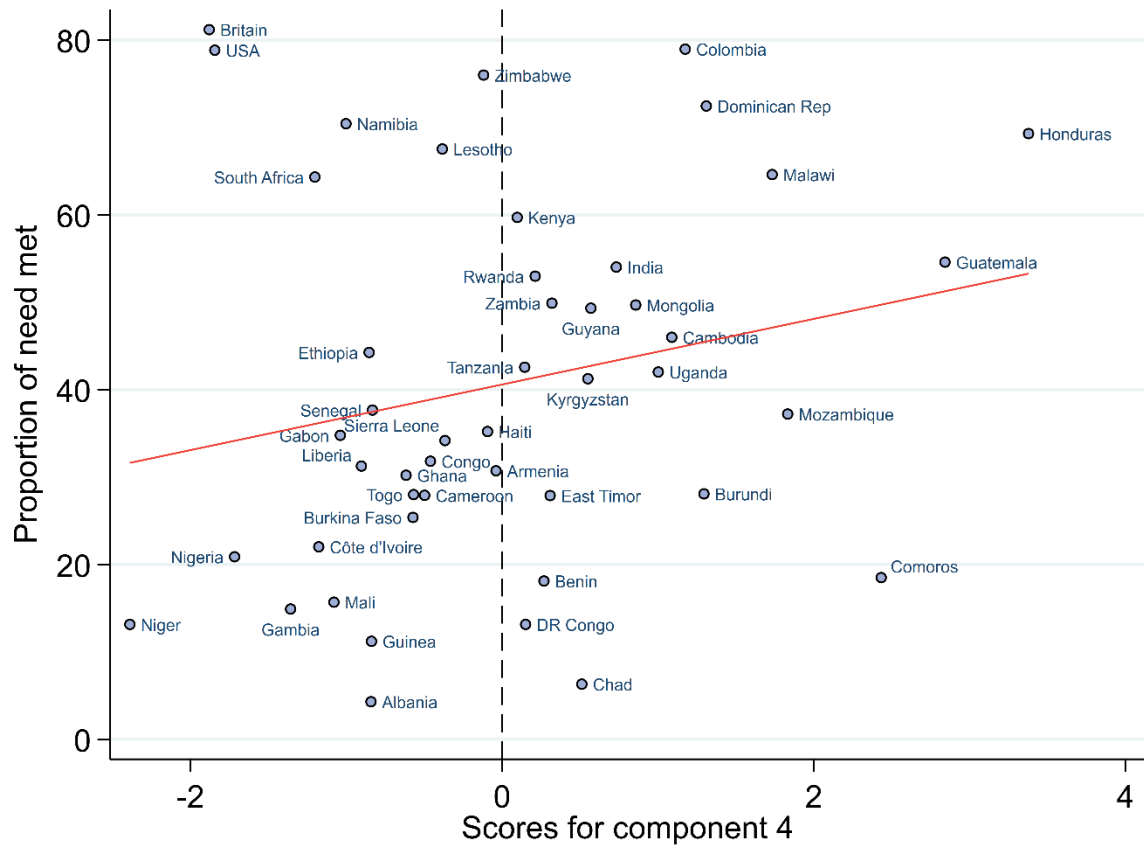

Figure S4: Linear relationship of PC4 score with met need for modern contraceptive methods
